# Supplementary material for: Sex Differences Partially Moderate the Relationships Between Personal Values and the Preference for Cross-Sex Friendships (Heterosociality)
Source: Atypon-hosted journal article supplement (doi:10.1027/1614-0001/a000367), 2022-03-11
Supplement: 1614-0001_a000367_esm1.pdf [file 1614-0001_a000367_esm1.pdf]

## **Electronic Supplementary Material for**

**Altmann, T. (2022). Sex Differences Partially Moderate the Relationships Between Personal Values and the Preference for Cross-Sex Friendships (Heterosociality). *Journal of Individual Differences*. <https://doi.org/10.1027/1614-0001/a000367>**

## **An Extended Description of the 10 Personal Values in Relation to Other Broad**

### **Constructs of Personality**

To further describe personal values in light of other concepts of personality, their relationships with the Big Five as well as agency/communion will be discussed. Frist, Roccas et al. (2016) found small- to medium-sized correlations with the Big Five (the mean magnitude of the correlations across all 350 coefficients was .15). The self-enhancement values (achievement and power) were negatively associated with agreeableness and openness but also partially positively associated with extraversion. The juxtaposed self-transcendence values (benevolence and universalism) were positively associated with agreeableness and openness but not with extraversion. The conservation values (conformity, security, and tradition) were positively associated with agreeableness and negatively associated with openness, whereas the juxtaposed openness to change values (hedonism, self-direction, and stimulation) were associated with the same traits in the opposite directions (i.e., positively associated with openness and negatively associated with agreeableness). Conscientiousness and neuroticism were only marginally correlated with the 10 personal values. The main conclusion may be that the juxtaposed value groups tend to show opposite correlations and that the four groups can be characterized (at least to some extent) by a distinct set of correlates with the Big Five, describing “what people [who share a certain value] are like” (Roccas et al., 2016, p. 790).

The second approach for further describing personal values was suggested by Trapnell and Paulhus (2012) who related personal values to the two primary human motives/values

(both terms are often used in the literature) of agency (“getting ahead”) and communion (“getting along”), as coined by Bakan (1966). Achievement and power (self-enhancement values) were strongly associated with agency, whereas the juxtaposed self-transcendence values (benevolence and universalism) were strongly associated with communion. Similarly, conformity, security, and tradition (conservation values) were moderately associated with communion, whereas the juxtaposed openness to change values (hedonism, self-direction, and stimulation) were moderately associated with agency. Again, the juxtaposition of personal values proved to be a reliable pattern in explaining the findings. In addition, the findings by Trapnell and Paulhus (2012) showed that the self-enhancement values and the openness to change values share a common characteristic of individualistic proactivity (agency), whereas the other two groups of values (self-transcendence and conservation values) share a common characteristic of social collective orientation (communion).

## References

- Bakan, D. (1966). *The duality of human existence: An essay on psychology and religion*. Rand McNally.
- Roccas, S., Sagiv, L., Schwartz, S. H., & Knafo, A. (2016). The Big Five personality factors and personal values. *Personality and Social Psychology Bulletin*, 28(6), 789-801.  
<https://doi.org/10.1177/0146167202289008>
- Trapnell, P. D., & Paulhus, D. L. (2012). Agentic and communal values: Their scope and measurement. *Journal of Personality Assessment*, 94(1), 39-52.  
<https://doi.org/10.1080/00223891.2011.627968>

**Table E1**

*Intercorrelations of the Personal Values*

|                  | 1      | 2       | 3      | 4      | 5       | 6       | 7      | 8      | 9      |
|------------------|--------|---------|--------|--------|---------|---------|--------|--------|--------|
| 1 Achievement    | 1      |         |        |        |         |         |        |        |        |
| 2 Benevolence    | .077** | 1       |        |        |         |         |        |        |        |
| 3 Conformity     | .260** | .217**  | 1      |        |         |         |        |        |        |
| 4 Hedonism       | .176** | .243**  | .059*  | 1      |         |         |        |        |        |
| 5 Power          | .524** | -.074** | .076** | .105** | 1       |         |        |        |        |
| 6 Security       | .274** | .178**  | .436** | .111** | .152**  | 1       |        |        |        |
| 7 Self-direction | .234** | .274**  | -.047  | .242** | .117**  | .148**  | 1      |        |        |
| 8 Stimulation    | .225** | .204**  | -.058* | .406** | .143**  | -.082** | .344** | 1      |        |
| 9 Tradition      | .050   | .132**  | .464** | -.004  | -.043   | .304**  | -.059* | .006   | 1      |
| 10 Universalism  | -.029  | .426**  | .113** | .128** | -.153** | .156**  | .334** | .137** | .110** |
